# Supplementary material
Source: Springer Nature journal article supplement (https://www.springermedizin.de/resource/supplementary/13099_2010_46_MOESM1_ESM.pdf/9665400)

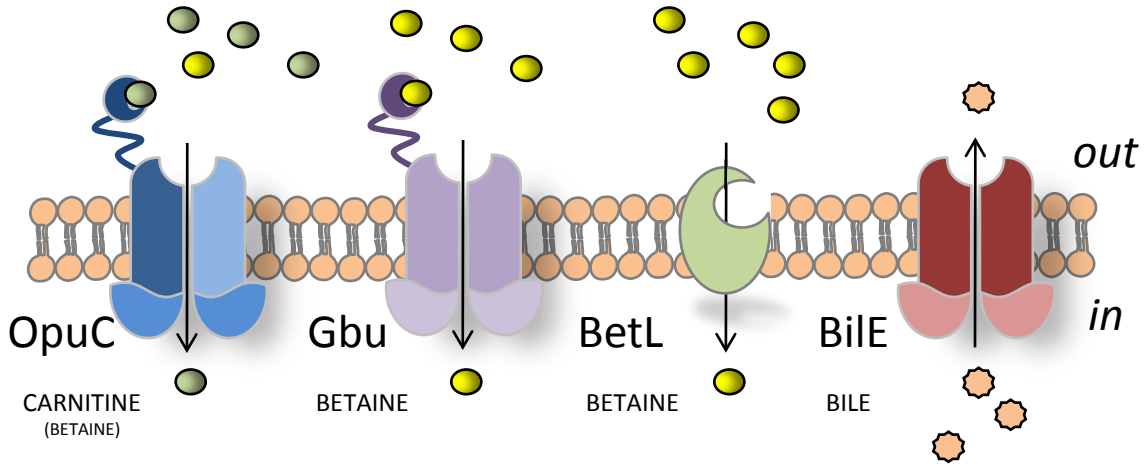

Supplement: MOESM1 [file 9665400]
